# Supplementary material for: Exploring Propolis as a Sustainable Bio-Preservative Agent to Control Foodborne Pathogens in Vacuum-Packed Cooked Ham
Source: MDPI journal article supplement (doi:10.3390/microorganisms12050914), 2024-04-30
Supplement: s1 [file s1]

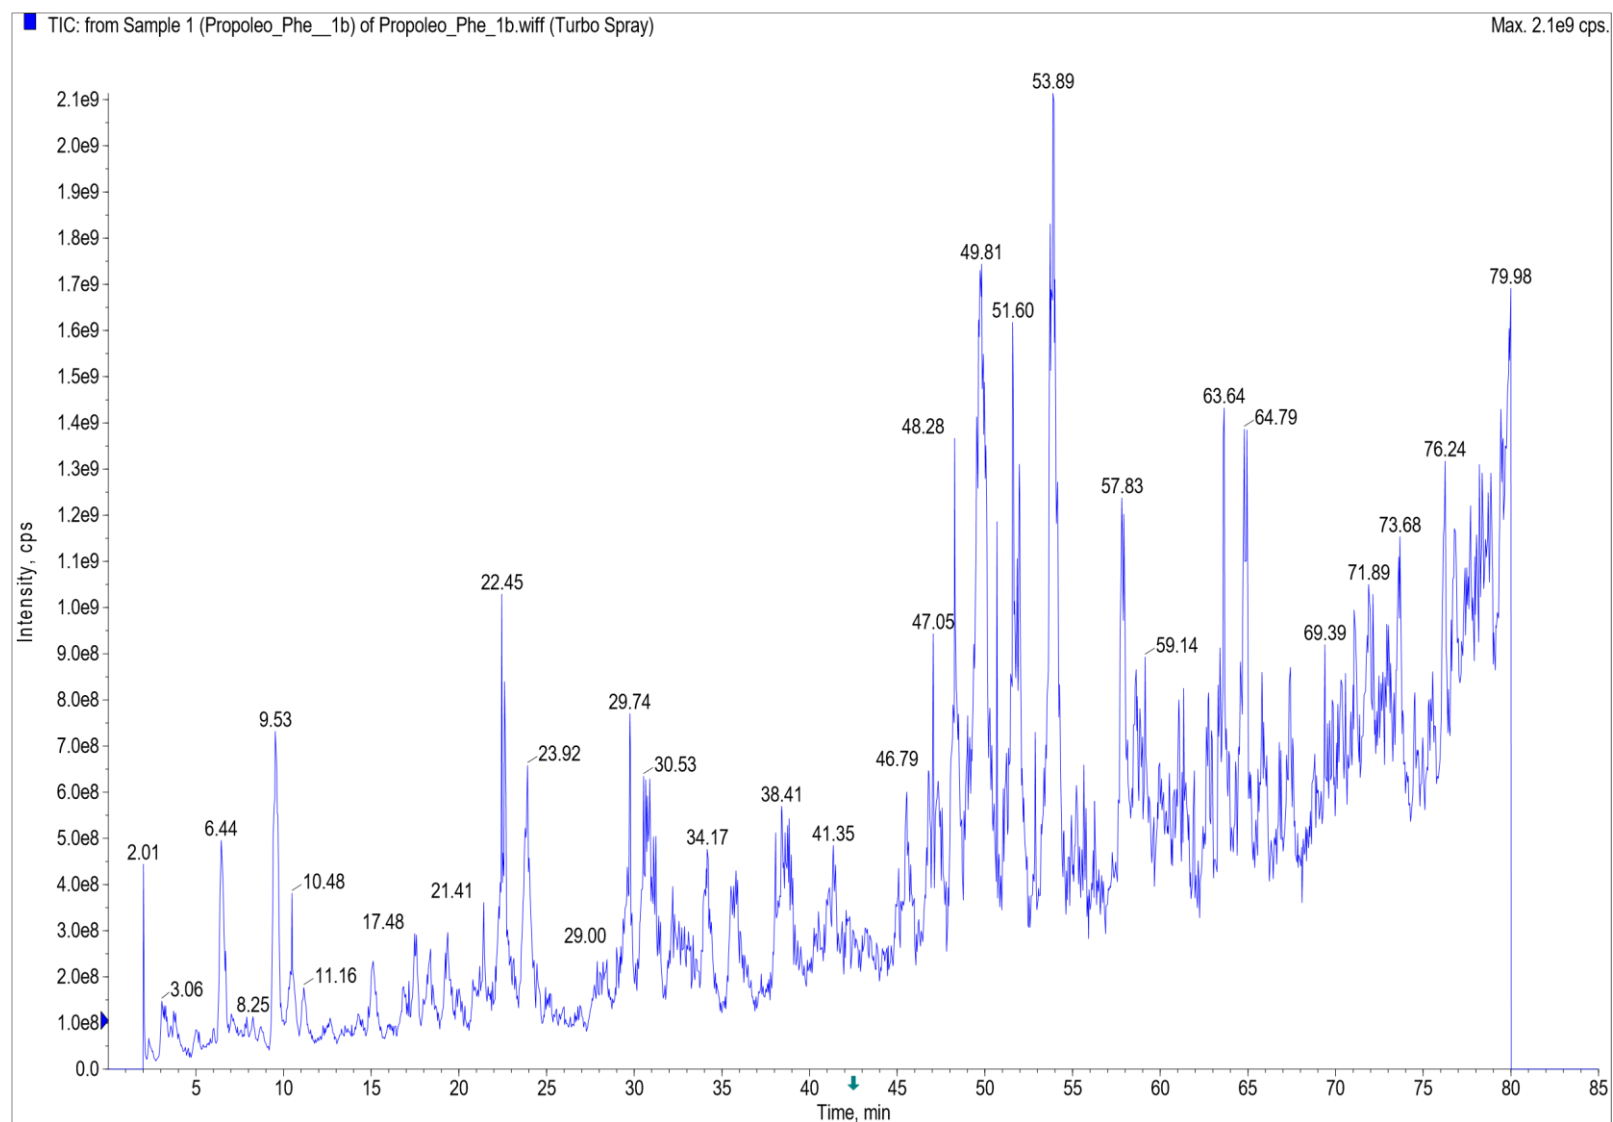

**Figure S1.** Total Ion Chromatogram (TIC) of the selected propolis.

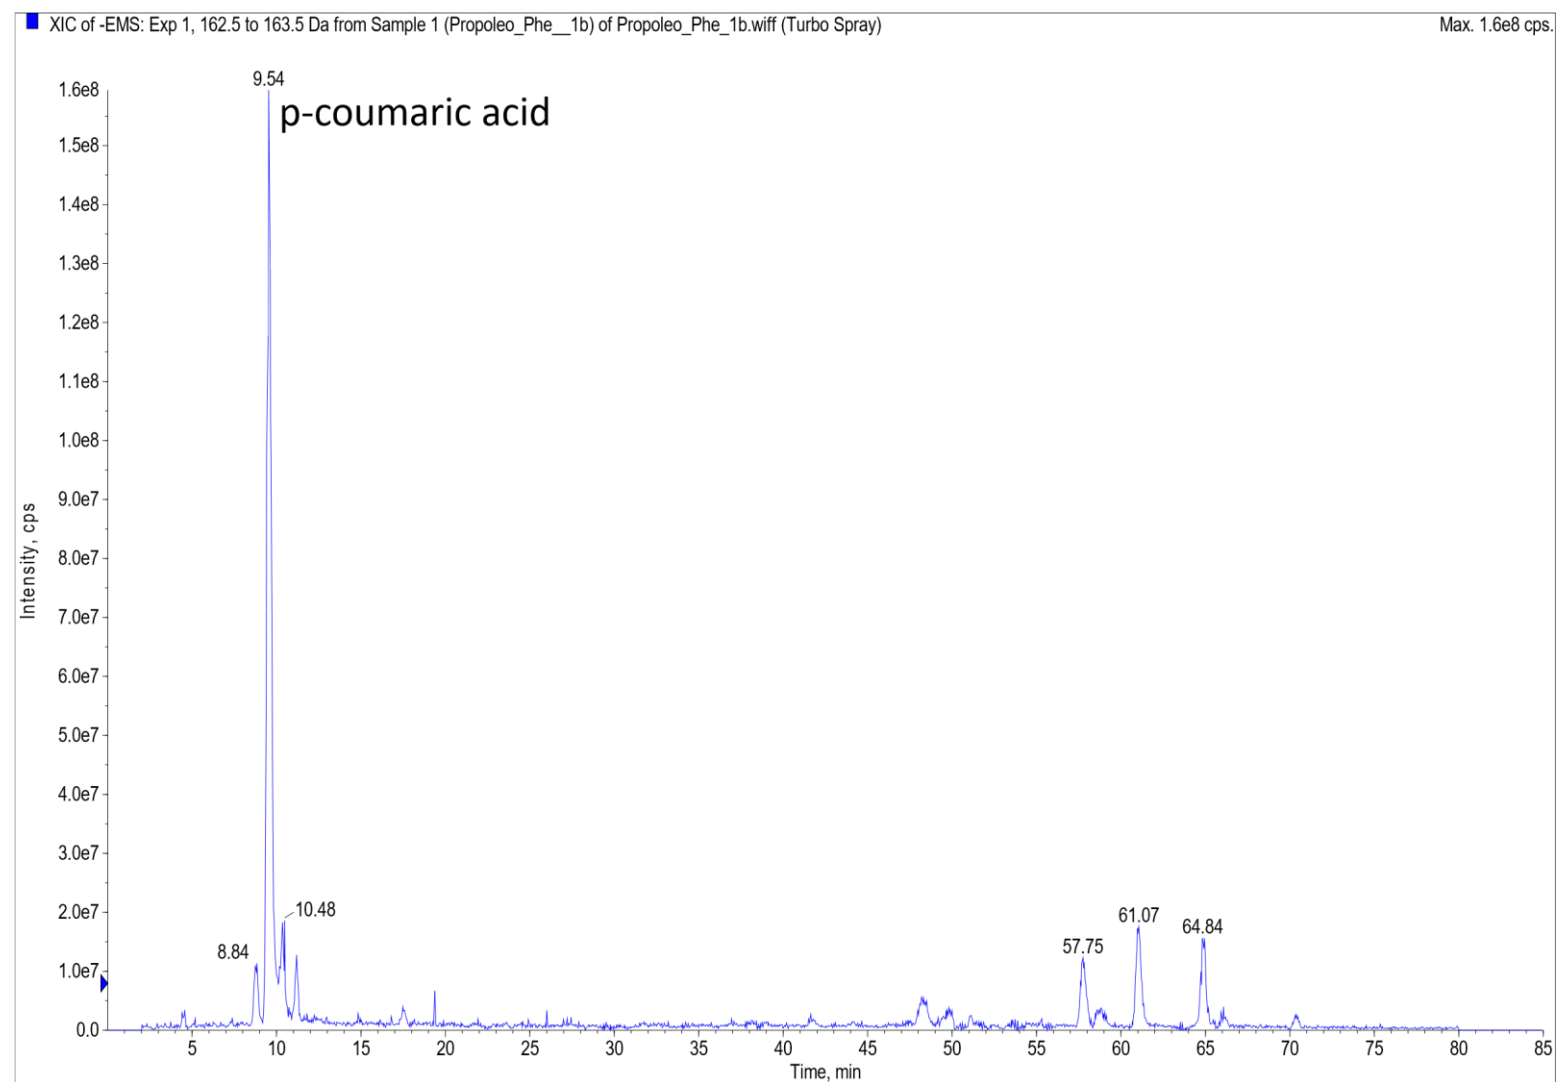

**Figure S2.** Extracted ion chromatogram of propolis against target mass ions of p- coumaric acid m/z 163

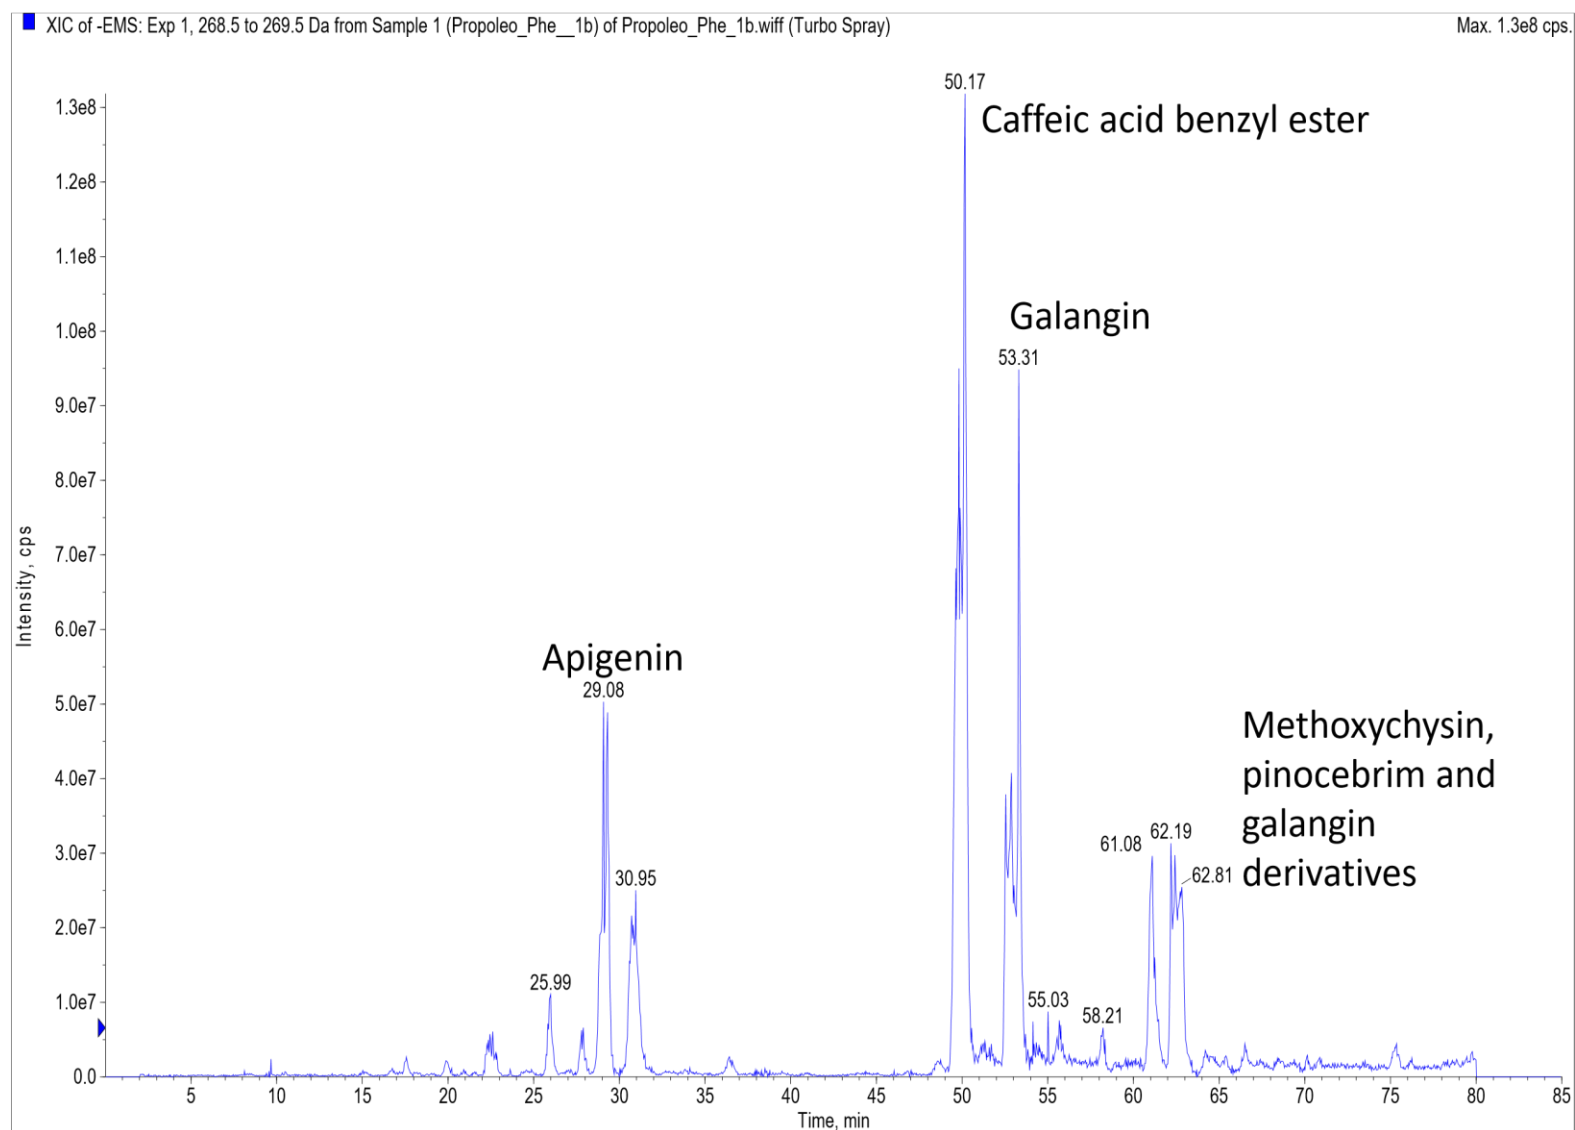

**Figure S3.** Extracted ion chromatogram of propolis against target mass ions  $m/z$  269

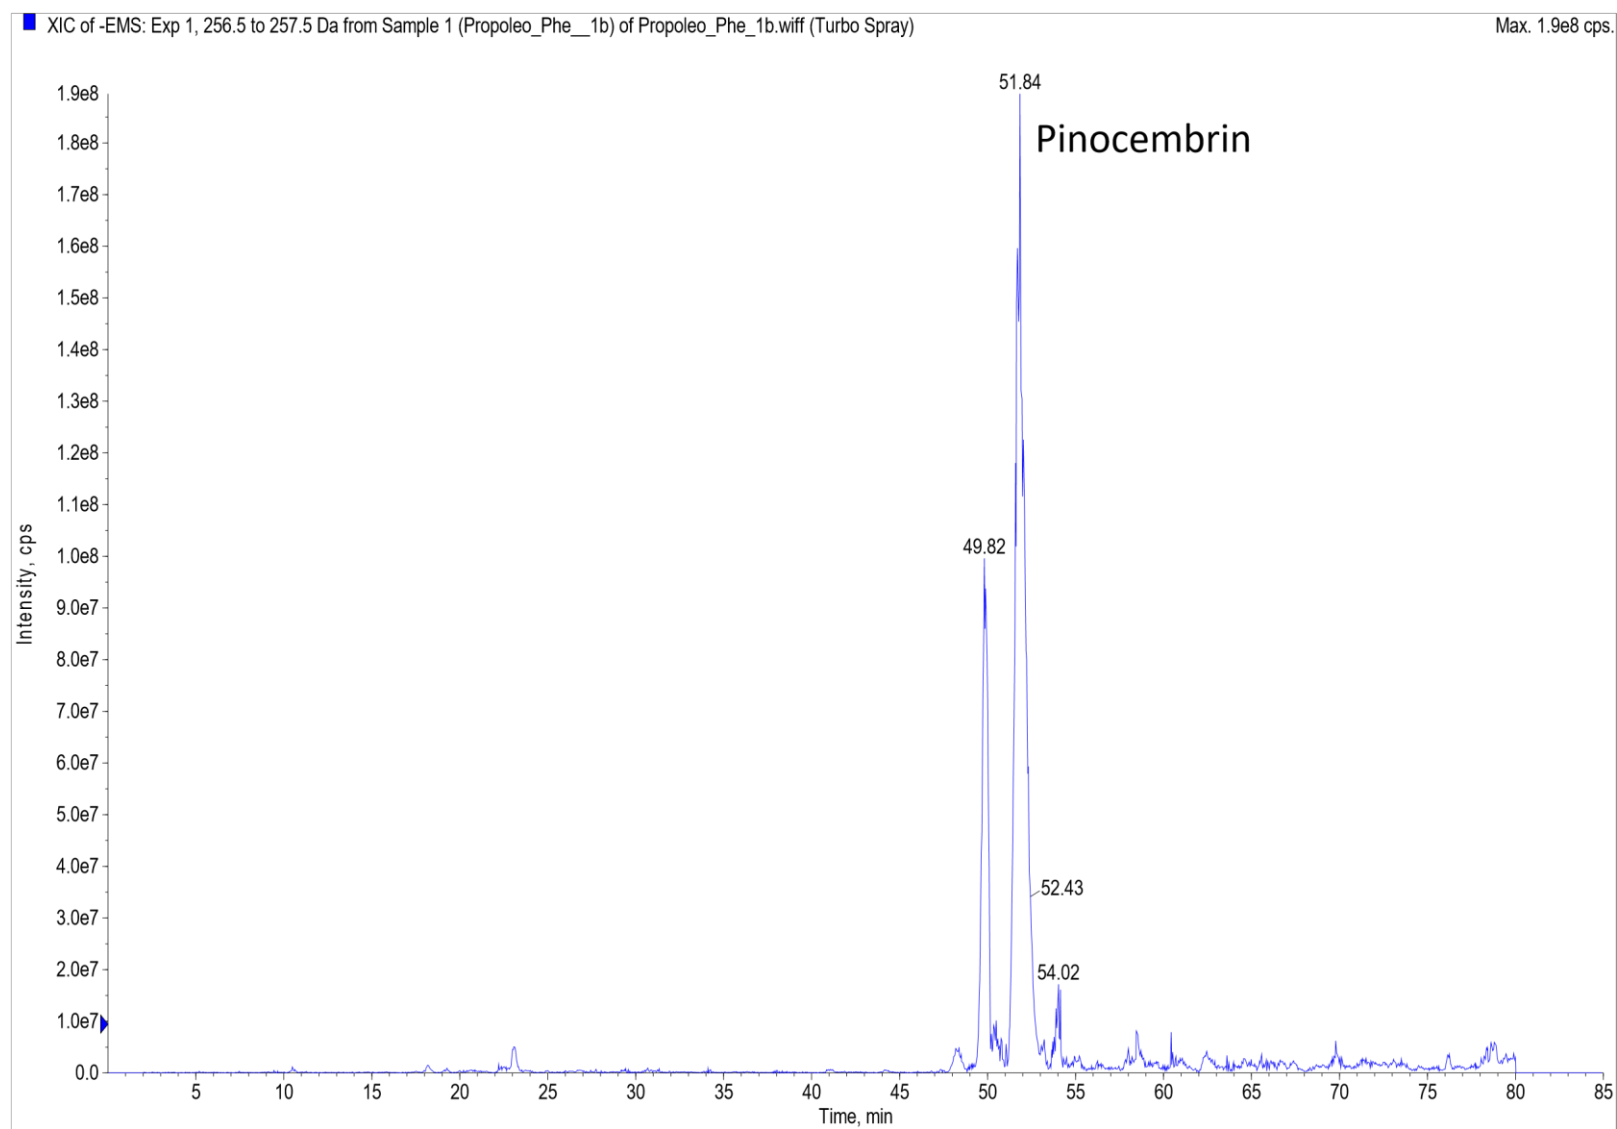

**Figure S4.** Extracted ion chromatogram of propolis against target mass ions  $m/z$  257
